# Supplementary material for: Polyunsaturated ω-3 fatty acids inhibit ACE2-controlled SARS-CoV-2 binding and cellular entry
Source: PubMed Central journal article supplement (PMC7933164; doi:10.1038/s41598-021-84850-1), 2021-03-04
Supplement: 41598_2021_84850_MOESM1_ESM.pdf [file 41598_2021_84850_MOESM1_ESM.pdf]

## Supplementary Information

### **Polyunsaturated $\omega$ -3 fatty acids inhibit ACE2-controlled SARS-CoV-2 binding and cellular entry**

Anna Goc<sup>1\*</sup>, Aleksandra Niedzwiecki<sup>1\*</sup>, Matthias Rath<sup>1</sup>

<sup>1</sup>Dr. Rath Research Institute, 5941 Optical Ct., San Jose, CA 95138, USA

## Supplementary Figure S1

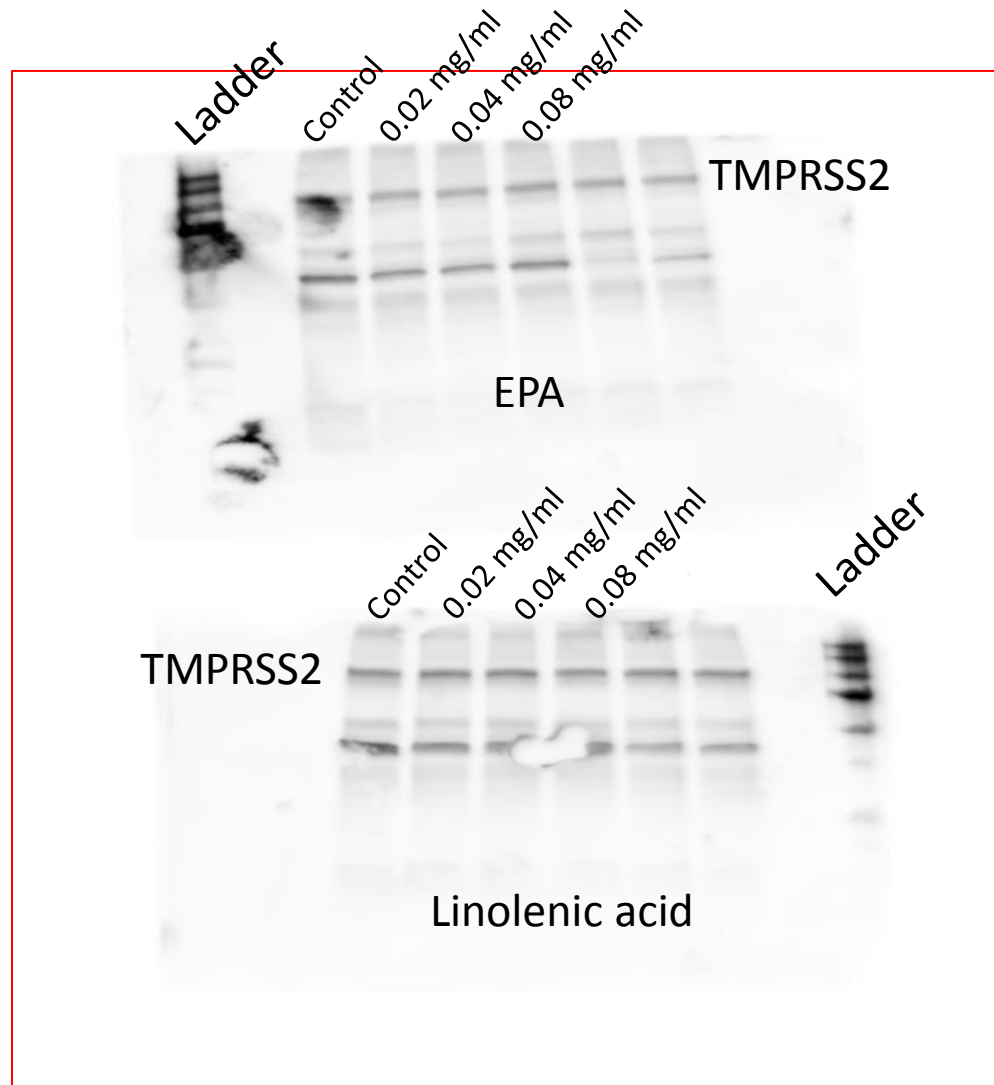

**Supplementary Figure S1. Analysis of TMPRSS2 expression at protein level in A549 cells treated with indicated FAs with different concentration for 48h.** Experiment was done using Western blot method with rabbit anti-TMPRSS2 monoclonal antibody at 1:1000 dilution. A 50  $\mu$ g/well of protein was separated on 8-16% gradient SDS-PAGE gels. Original WB images were acquired using the Azure cSeries digital system and auto-exposure settings.

## Supplementary Figure S2

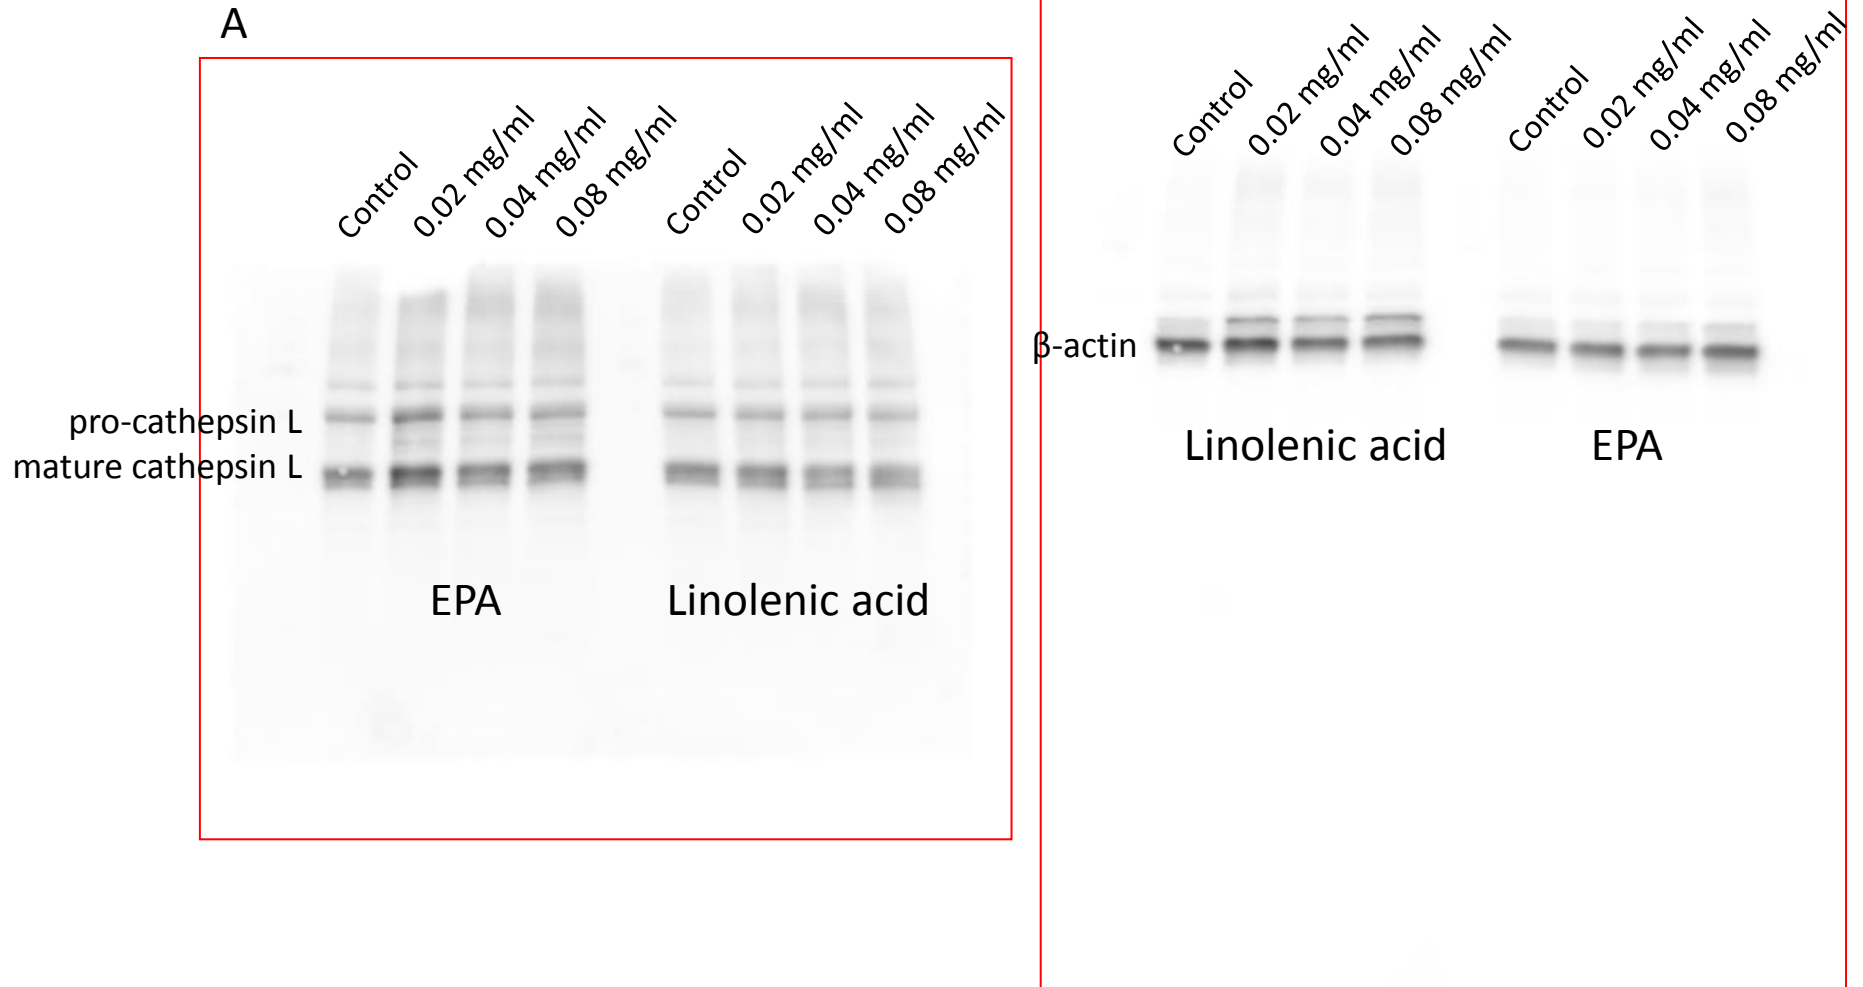

**Supplementary Figure S2. Analysis of cathepsin L expression at protein level in A549 cells treated with indicated FAs with different concentration for 48h.** Experiment was done using Western blot method with mouse anti-cathepsin L monoclonal antibody at 1:200 dilution (A) and anti- $\beta$ -actin antibody at 1:1000 dilution as a loading control (B). A 50  $\mu$ g/well of protein was separated on 8-16% gradient SDS-PAGE gels. Original WB images were acquired using the Azure cSeries digital system and auto-exposure settings.
